# Supplementary material for: Prospective Analysis: Relative Survival in Patients with Chronic Myeloid Leukemia in Chronic Phase in the Era of Tyrosine Kinase Inhibitors
Source: PubMed Central journal article supplement — Lancet Haematol. Author manuscript; Available in PMC 2016 May 27. (PMC4884053; doi:10.1016/s2352-3026(15)00048-4), 2015-04-20
Supplement: NIHMS786194-supplement-1.pdf [file NIHMS786194-supplement-1.pdf]

**Appendix:**

**Table 2-1. Relative survival by tyrosine kinase inhibitor and cumulative response within 1 year**

| Group                  | No. at 5y | 5-y Absolute OS [95% CI] | 5-y Relative OS [95% CI] | 5-y OS in GP | No. at 10y | 10-y Absolute OS [95% CI] | 10-y Relative OS [95% CI] | 10-y OS in GP |
|------------------------|-----------|--------------------------|--------------------------|--------------|------------|---------------------------|---------------------------|---------------|
| <b>All TKI Group</b>   |           |                          |                          |              |            |                           |                           |               |
| All N=483              | 312       | 92.7 [90.1-95.3]         | 94.8 [92.1-97.4]         | 97.8         | 127        | 83.5 [79.2-87.9]          | 88.3 [83.7-92.9]          | 94.6          |
| CCyR N=425             | 284       | 94.5 [92.1-96.9]         | 96.6 [94.2-99.1]         | 97.8         | 115        | 87.1 [82.7-91.4]          | 92.1 [87.4-96.6]          | 94.6          |
| MMR N=349              | 234       | 96.5 [94.4-98.7]         | 98.7 [96.5-100.9]        | 97.8         | 91         | 89.0 [84.5-93.7]          | 94.1 [89.3-99.0]          | 94.6          |
| MR4.5 N=162            | 105       | 95.8 [92.1-99.4]         | 98.1 [94.3-101.7]        | 97.7         | 47         | 88.5 [81.9-95.0]          | 93.9 [86.9-100.8]         | 94.2          |
| CMR N=84               | 53        | 98.6[95.8-100]           | 100.9[98.1-102.4]        | 97.7         | 21         | 91.7 [82.2-100]           | 97.3 [87.3-106.2]         | 94.2          |
| <b>Imatinib Group</b>  |           |                          |                          |              |            |                           |                           |               |
| All N=271              | 239       | 92.4 [89.2-95.6]         | 94.5 [91.2-97.8]         | 97.8         | 127        | 83.3 [78.5-88.0]          | 88.0 [82.9-92.9]          | 94.7          |
| CCyR N=229             | 212       | 94.7 [91.8-97.6]         | 96.9 [94.0-99.9]         | 97.7         | 115        | 87.4 [82.8-92.0]          | 92.8 [87.9-97.7]          | 94.2          |
| MMR N=184              | 176       | 97.3 [94.9-99.6]         | 99.5 [97.0-101.8]        | 97.8         | 91         | 90.0 [85.2-94.8]          | 95.1 [90.1-100.2]         | 94.6          |
| MR4.5 N=81             | 78        | 97.5 [94.1-100]          | 100.1 [96.6-102.7]       | 97.4         | 47         | 89.7 [82.9-96.5]          | 95.6 [88.4-102.9]         | 93.8          |
| CMR N=34               | 33        | 100                      | 102.5                    | 97.6         | 21         | 93.1 [83.7-100]           | 99.0 [89.0-106.4]         | 94.0          |
| <b>Dasatinib Group</b> |           |                          |                          |              |            |                           |                           |               |
| All N=107              | 40        | 97.6 [94.1-100]          | 99.6 [96.0-102]          | 98.0         | 0          | NA                        | NA                        | 95.1          |
| CCyR N=99              | 39        | 97.4 [93.7-100]          | 99.6 [95.8-102.2]        | 97.8         | 0          | NA                        | NA                        | 94.7          |
| MMR N=79               | 30        | 98.7 [96.1-100]          | 100.9 [98.3-102.2]       | 97.8         | 0          | NA                        | NA                        | 94.7          |
| MR4.5 N=38             | 12        | 100                      | 102.1                    | 97.9         | 0          | NA                        | NA                        | 94.9          |
| CMR N=27               | 9         | 100                      | 102.2                    | 97.8         | 0          | NA                        | NA                        | 94.7          |
| <b>Nilotinib Group</b> |           |                          |                          |              |            |                           |                           |               |
| All N=105              | 33        | 87.6 [78.5-96.7]         | 89.6 [80.3-98.9]         | 97.8         | 0          | NA                        | NA                        | 94.6          |
| CCyR N=97              | 33        | 89.8 [81.0-98.6]         | 91.9 [82.9-100.9]        | 97.7         | 0          | NA                        | NA                        | 94.3          |
| MMR N=86               | 28        | 90.9 [82.0-99.9]         | 93.0 [83.9-102.2]        | 97.7         | 0          | NA                        | NA                        | 94.4          |
| MR4.5 N=43             | 15        | 85.6 [70.2-100]          | 87.7 [71.9-102.5]        | 97.6         | 0          | NA                        | NA                        | 94.1          |
| CMR N=23               | 11        | 94.1 [82.9-100]          | 96.4 [84.9-102.5]        | 97.6         | 0          | NA                        | NA                        | 94.2          |

Abbreviations: OS, overall survival; GP, general population; CI, confidence interval; CCyR, complete cytogenetic response; MMR, major molecular response; MR4.5, molecular response with 4.5 log reduction by international scale; CMR, complete molecular response; NA, not applicable.

**Table 3-1. Cause of death by cumulative response within 1 year in age 15-44**

| <b>Age 15-44</b>                                      | <b>All<br/>N= 197</b> | <b>CCyR*<br/>N= 165</b> | <b>MMR*<br/>N=136</b> | <b>MR4·5*<br/>N=62</b> | <b>CMR<br/>N=34</b> |
|-------------------------------------------------------|-----------------------|-------------------------|-----------------------|------------------------|---------------------|
| Number of death, (%)                                  | 12 (6)                | 4 (2)                   | 3 (2)                 | 1 (1)                  | 0                   |
| Progression to AP/BP, (%)                             | 5 (42)                | 0                       | 0                     | 0                      | 0                   |
| SCT complications, (%)                                | 3 (25)                | 1 (25)                  | 1 (33)                | 0                      | 0                   |
| Cardiovascular events, (%)                            | 1 (8)                 | 1 (25)                  | 0                     | 0                      | 0                   |
| Car accident, No. (%)                                 | 2 (17)                | 1 (25)                  | 1 (33)                | 0                      | 0                   |
| Other, No. (%)                                        | 1 (8)                 | 1 (25)                  | 1 (33)                | 1 (100)                | 0                   |
| <b>Type of TKI, No. (%)</b>                           |                       |                         |                       |                        |                     |
| Imatinib                                              | 12 (100)              | 4 (100)                 | 3 (100)               | 1 (100)                | 0                   |
| Dasatinib                                             | 0                     | 0                       | 0                     | 0                      | 0                   |
| Nilotinib                                             | 0                     | 0                       | 0                     | 0                      | 0                   |
| <b>Overall cumulative response, No. (%)</b>           |                       |                         |                       |                        |                     |
| CCyR                                                  | 4 (33)                | 4 (100)                 | 3 (100)               | 1 (100)                | 0                   |
| MMR                                                   | 3 (25)                | 3 (75)                  | 3 (100)               | 1 (100)                | 0                   |
| MR4·5                                                 | 2 (17)                | 2 (50)                  | 2 (67)                | 1 (100)                | 0                   |
| CMR                                                   | 1 (8)                 | 1 (25)                  | 1 (33)                | 1 (100)                | 0                   |
| <b>Disease status** at the time of death, No. (%)</b> |                       |                         |                       |                        |                     |
| CML-AP/BP                                             | 3 (25)                | 0                       | 0                     | 0                      | 0                   |
| CHR                                                   | 1 (8)                 | 0                       | 0                     | 0                      | 0                   |
| CCyR                                                  | 1 (8)                 | 0                       | 0                     | 0                      | 0                   |
| MMR                                                   | 1 (8)                 | 1 (25)                  | 1 (33)                | 0                      | 0                   |
| MR4·5                                                 | 1 (8)                 | 1 (25)                  | 1 (33)                | 1 (100)                | 0                   |
| CMR                                                   | 3 (25)                | 2 (50)                  | 1 (33)                | 0                      | 0                   |
| Unknown                                               | 2 (17)                | 0                       | 0                     | 0                      | 0                   |

\*: CCyR includes CCyR or better; MMR includes MMR or better; MR4·5 includes MR4·5 or better.

\*\* : Each status represents the best category of response or disease status at the time of death.

Abbreviations: AP, accelerated phase; BP, blast phase; CP, chronic phase; CCyR, complete cytogenetic response; MMR, major molecular response; MR4·5, molecular response by a 4·5 log reduction on the international scale; CMR, complete molecular response; SCT, stem cell transplant; TKI, tyrosine kinase inhibitor; CML, chronic myeloid leukemia.

**Table 3-2. Cause of death by cumulative response within 1 year in age 45-64**

| Age 45-64                                             | All<br>N= 222 | CCyR*<br>N= 202 | MMR*<br>N=169 | MR4·5*<br>N=75 | CMR<br>N=40 |
|-------------------------------------------------------|---------------|-----------------|---------------|----------------|-------------|
| Number of death, No. (%)                              | 19 (9)        | 12 (6)          | 7 (4)         | 3 (2)          | 0           |
| Progression to AP/BP, No. (%)                         | 5 (26)        | 3 (25)          | 1 (14)        | 0              | 0           |
| SCT complications, No. (%)                            | 2 (11)        | 0               | 0             | 0              | 0           |
| Secondary malignancy, No. (%)                         | 4 (21)        | 3 (25)          | 2 (29)        | 1 (33)         | 0           |
| Cardiovascular events, No. (%)                        | 1 (5)         | 1 (8)           | 1 (14)        | 0              | 0           |
| Sepsis, No. (%)                                       | 1 (5)         | 1 (8)           | 0             | 0              | 0           |
| Dementia, No. (%)                                     | 1 (5)         | 1 (8)           | 1 (14)        | 1 (33)         | 0           |
| Surgical complications, No. (%)                       | 1 (5)         | 1 (8)           | 1 (14)        | 0              | 0           |
| HCV cirrhosis, No. (%)                                | 1 (5)         | 0               | 0             | 0              | 0           |
| Unknown, No. (%)                                      | 3 (16)        | 2 (17)          | 1 (14)        | 1 (33)         | 0           |
| <b>Type of TKI, No. (%)</b>                           |               |                 |               |                |             |
| Imatinib                                              | 15 (79)       | 10 (83)         | 6 (86)        | 3 (100)        | 0           |
| Dasatinib                                             | 1 (5)         | 1 (8)           | 1 (14)        | 0              | 0           |
| Nilotinib                                             | 3 (16)        | 1 (8)           | 0             | 0              | 0           |
| <b>Overall cumulative response, No. (%)</b>           |               |                 |               |                |             |
| CCyR                                                  | 14 (74)       | 12 (100)        | 7 (100)       | 3 (100)        | 0           |
| MMR                                                   | 11 (58)       | 9 (75)          | 7 (100)       | 3 (100)        | 0           |
| MR4·5                                                 | 5 (26)        | 4 (33)          | 3 (43)        | 3 (100)        | 0           |
| CMR                                                   | 3 (16)        | 2 (17)          | 1 (14)        | 1 (33)         | 0           |
| <b>Disease status** at the time of death, No. (%)</b> |               |                 |               |                |             |
| CML-AP/BP                                             | 5 (26)        | 3 (25)          | 1 (14)        | 0              | 0           |
| CML-CP                                                | 1 (5)         | 1 (8)           | 0             | 0              | 0           |
| CCyR                                                  | 1 (5)         | 1 (8)           | 1 (14)        | 0              | 0           |
| MMR                                                   | 3 (16)        | 3 (25)          | 2 (29)        | 0              | 0           |
| MR4·5                                                 | 2 (11)        | 2 (17)          | 2 (29)        | 2 (67)         | 0           |
| CMR                                                   | 5 (26)        | 1 (8)           | 0             | 0              | 0           |
| Unknown                                               | 2 (11)        | 1 (8)           | 1 (14)        | 1 (33)         | 0           |

\*: CCyR includes CCyR or better; MMR includes MMR or better; MR4·5 includes MR4·5 or better.

\*\* : Each status represents the best category of response or disease status at the time of death.

Abbreviations: AP, accelerated phase; BP, blast phase; CP, chronic phase; CCyR, complete cytogenetic response; MMR, major molecular response; MR4·5, molecular response by a 4·5 log reduction on the international scale; CMR, complete molecular response; SCT, stem cell transplant; TKI, tyrosine kinase inhibitor; CML, chronic myeloid leukemia; HCV, hepatitis C virus.

**Table 3-3. Cause of death by cumulative response within 1 year in age 65-84**

| <b>Age 65-84</b>                                      | <b>All<br/>N= 64</b> | <b>CCyR*<br/>N= 58</b> | <b>MMR*<br/>N=44</b> | <b>MR4·5*<br/>N=25</b> | <b>CMR<br/>N=11</b> |
|-------------------------------------------------------|----------------------|------------------------|----------------------|------------------------|---------------------|
| Number of death, No. (%)                              | 22 (34)              | 20 (34)                | 13 (25)              | 8 (17)                 | 3 (9)               |
| Progression to AP/BP, No. (%)                         | 2 (9)                | 1 (5)                  | 0                    | 0                      | 0                   |
| Secondary malignancy, No. (%)                         | 5 (23)               | 5 (25)                 | 3 (23)               | 2 (25)                 | 1 (33)              |
| Cardiovascular events, No. (%)                        | 7 (32)               | 7 (35)                 | 4 (31)               | 3 (6)                  | 0                   |
| Sepsis, No. (%)                                       | 1 (5)                | 1(5)                   | 1 (8)                | 1 (13)                 | 1 (33)              |
| Dementia, No. (%)                                     | 1 (5)                | 1 (5)                  | 1 (8)                | 0                      | 0                   |
| Surgical complications, No. (%)                       | 1 (5)                | 1 (5)                  | 1 (8)                | 0                      | 0                   |
| Bowel obstruction, No. (%)                            | 1 (5)                | 0                      | 0                    | 0                      | 0                   |
| Gastrointestinal bleeding, No. (%)                    | 1 (5)                | 1 (5)                  | 0                    | 0                      | 0                   |
| Parkinson disease, No. (%)                            | 1 (5)                | 1 (5)                  | 1 (8)                | 0                      | 0                   |
| Unknown, No. (%)                                      | 2 (9)                | 2 (10)                 | 2 (15)               | 2 (25)                 | 1 (33)              |
| <b>Type of TKI, No. (%)</b>                           |                      |                        |                      |                        |                     |
| Imatinib                                              | 16 (73)              | 14 (70)                | 8 (62)               | 5 (63)                 | 2 (67)              |
| Dasatinib                                             | 2 (9)                | 2 (10)                 | 1 (8)                | 0                      | 0                   |
| Nilotinib                                             | 4 (18)               | 4 (20)                 | 4 (31)               | 3 (38)                 | 1 (33)              |
| <b>Overall cumulative response, No. (%)</b>           |                      |                        |                      |                        |                     |
| CCyR                                                  | 20 (91)              | 20 (100)               | 13 (100)             | 8 (100)                | 3 (100)             |
| MMR                                                   | 14 (64)              | 14 (70)                | 13 (100)             | 8 (100)                | 3 (100)             |
| MR4·5                                                 | 12 (55)              | 12 (60)                | 11 (85)              | 8 (100)                | 3 (100)             |
| CMR                                                   | 8 (36)               | 8 (40)                 | 7 (54)               | 5 (63)                 | 3 (100)             |
| <b>Disease status** at the time of death, No. (%)</b> |                      |                        |                      |                        |                     |
| CML-AP/BP                                             | 1 (5)                | 0                      | 0                    | 0                      | 0                   |
| CML-CP                                                | 2 (9)                | 2 (10)                 | 0                    | 0                      | 0                   |
| CHR                                                   | 2 (9)                | 1 (5)                  | 0                    | 0                      | 0                   |
| CCyR                                                  | 1 (5)                | 1 (5)                  | 0                    | 0                      | 0                   |
| MMR                                                   | 3 (14)               | 3 (15)                 | 2 (15)               | 1 (13)                 | 1 (33)              |
| MR4·5                                                 | 4 (18)               | 4 (20)                 | 4 (31)               | 3 (38)                 | 0                   |
| CMR                                                   | 5 (23)               | 5 (25)                 | 4 (31)               | 2 (25)                 | 1 (33)              |
| Unknown                                               | 3 (14)               | 4 (20)                 | 3 (23)               | 2 (25)                 | 1 (33)              |

\*: CCyR includes CCyR or better; MMR includes MMR or better; MR4·5 includes MR4·5 or better.

\*\* : Each status represents the best category of response or disease status at the time of death.

Abbreviations: AP, accelerated phase; BP, blast phase; CP, chronic phase; CCyR, complete cytogenetic response; MMR, major molecular response; MR4·5, molecular response by a 4·5 log reduction on the international scale; CMR, complete molecular response; SCT, stem cell transplant; TKI, tyrosine kinase inhibitor; CML, chronic myeloid leukemia.

**Table 4. Multivariate Cox proportional hazards analysis of overall survival**

| Variable                                                   | Univariate | Multivariate Analysis |       |              |
|------------------------------------------------------------|------------|-----------------------|-------|--------------|
|                                                            | <i>P</i>   | <i>P</i>              | HR    | 95% CI       |
| Age at diagnosis                                           | <0.0001    | <0.0001               | 1.045 | 1.026-1.065  |
| Clonal evolution at diagnosis                              | 0.031      | 0.028                 | 2.841 | 1.121-7.149  |
| Sokal risk Score                                           | 0.15       |                       |       |              |
| Type of TKIs                                               | 0.45       |                       |       |              |
| Time from diagnosis to TKI                                 | 0.26       |                       |       |              |
| <b>Cumulative response with a time dependent variable*</b> |            |                       |       |              |
| CCyR                                                       | <0.0001    | <0.0001               | 6.250 | 3.367-11.494 |
| MMR                                                        | <0.0001    | <0.0001               | 6.579 | 3.745-11.628 |
| MR4.5                                                      | <0.0001    | <0.0001               | 5.154 | 2.841-9.346  |
| CMR                                                        | <0.0001    | 0.0013                | 3.003 | 1.538-5.882  |

\*: Each variable was compared to the counterpart no response category and calculated for multivariate analysis separately.

Abbreviations: TKI, tyrosine kinase inhibitor; HR, hazard ratio; CI, confidence interval; CCyR, complete cytogenetic response; MMR, major molecular response; MR4.5, molecular response with 4.5 log reduction by international scale; CMR, complete molecular response; OS, overall survival.

**Table 5. One-year landmark by cumulative response within one year**

| Group            | No. at 5y | 5-y Absolute OS [95% CI] | 5-y Relative OS [95% CI] | 5-y OS in GP | No. at 10y | 10-y Absolute OS [95% CI] | 10-y Relative OS [95% CI] | 10-y OS in GP |
|------------------|-----------|--------------------------|--------------------------|--------------|------------|---------------------------|---------------------------|---------------|
| <b>Age 15-84</b> |           |                          |                          |              |            |                           |                           |               |
| All N=465        | 312       | 93.5 [91.0-95.9]         | 95.1 [92.6-97.6]         | 98.3         | 127        | 84.2 [79.9-88.6]          | 88.4 [83.9-93.1]          | 95.2          |
| CCyR N=413       | 284       | 95.2 [92.8-97.5]         | 97.0 [94.6-99.4]         | 98.1         | 115        | 87.7 [83.4-92.0]          | 92.3 [87.8-96.8]          | 95.0          |
| MMR N=338        | 234       | 97.3 [95.4-99.3]         | 99.1 [97.1-101.1]        | 98.2         | 91         | 89.9 [85.3-94.4]          | 94.6 [89.8-99.4]          | 95.0          |
| MR4.5 N=159      | 105       | 95.8 [92.1-99.4]         | 97.8 [94.0-101.4]        | 98.0         | 47         | 88.5 [81.9-95.0]          | 93.5 [86.5-100.3]         | 94.7          |
| CMR N=81         | 53        | 98.6 [95.8-100]          | 100.5 [97.7-101.9]       | 98.1         | 21         | 91.7 [82.2-100]           | 96.8 [86.8-105.6]         | 94.7          |
| <b>Age 15-44</b> |           |                          |                          |              |            |                           |                           |               |
| All N=189        | 131       | 96.2 [93.2-99.2]         | 96.9 [93.9-99.9]         | 99.3         | 48         | 90.0 [84.4-95.6]          | 91.6 [85.9-97.4]          | 98.2          |
| CCyR N=160       | 117       | 99.2 [97.7-100]          | 99.9 [98.4-100.7]        | 99.3         | 42         | 95.5 [90.9-100]           | 97.3 [92.6-101.8]         | 98.2          |
| MMR N=131        | 95        | 99.1 [97.2-100]          | 99.8 [97.9-100.7]        | 99.3         | 34         | 96.0 [91.4-100]           | 97.9 [93.2-101.9]         | 98.1          |
| MR4.5 N=60       | 41        | 100                      | 100.7                    | 99.3         | 19         | 97.0 [91.1-100]           | 99.0 [93.0-102.0]         | 98.0          |
| CMR N=32         | 21        | 100                      | 100.7                    | 99.3         | 10         | 100                       | 102.1                     | 97.9          |
| <b>Age 45-64</b> |           |                          |                          |              |            |                           |                           |               |
| All N=214        | 140       | 94.4 [90.9-97.8]         | 97.0 [93.4-100.5]        | 97.3         | 58         | 88.0 [82.4-93.6]          | 94.7 [88.7-100.8]         | 92.9          |
| CCyR N=196       | 130       | 96.1 [93.0-99.2]         | 98.8 [95.6-102.0]        | 97.3         | 54         | 92.0 [87.0-97.0]          | 99.0 [93.6-104.4]         | 92.9          |
| MMR N=164        | 110       | 98.5 [96.5-100]          | 101.2 [99.2-102.8]       | 97.3         | 43         | 94.6 [89.7-99.4]          | 101.8 [96.6-107.0]        | 92.9          |
| MR4.5 N=74       | 49        | 98.2 [94.8-100]          | 100.7 [97.2-102.6]       | 97.5         | 20         | 92.8 [84.7-100]           | 99.5 [90.8-107.2]         | 93.3          |
| CMR N=39         | 24        | 100                      | 102.8                    | 97.3         | 7          | 100                       | 107.6                     | 92.9          |
| <b>Age 65-84</b> |           |                          |                          |              |            |                           |                           |               |
| All N=62         | 41        | 82.7 [72.4-93.0]         | 92.4 [80.9-103.9]        | 89.5         | 21         | 60.9 [46.2-75.5]          | 83.4 [63.6-104.0]         | 72.6          |
| CCyR N=57        | 37        | 81.3 [70.2-92.3]         | 90.8 [78.4-103.1]        | 89.5         | 19         | 59.5 [44.0-74.9]          | 82.0 [60.6-103.2]         | 72.6          |
| MMR N=43         | 29        | 88.3 [77.5-99.1]         | 99.7 [87.5-111.9]        | 88.6         | 14         | 61.9 [43.6-80.3]          | 88.9 [62.6-115.4]         | 69.6          |
| MR4.5 N=25       | 15        | 80.0 [62.5-97.5]         | 88.5 [69.1-107.9]        | 90.4         | 8          | 61.7 [38.9-94.5]          | 82.6 [52.1-126.5]         | 74.7          |
| CMR N=10         | 8         | 88.9 [68.4-100]          | 98.6 [75.8-110.9]        | 90.2         | 4          | 61.0 [25.6-96.3]          | 82.3 [34.5-130.0]         | 74.1          |

Abbreviations: OS, overall survival; GP, general population; CI, confidence interval; CCyR, complete cytogenetic response; MMR, major molecular response; MR4.5, molecular response with 4.5 log reduction by international scale; CMR, complete molecular response.

**Table 6. One-year landmark by tyrosine kinase inhibitor and cumulative response within 1 year**

| Group                  | No. at 5y | 5-y Absolute OS [95% CI] | 5-y Relative OS [95% CI] | 5-y OS in GP | No. at 10y | 10-y Absolute OS [95% CI] | 10-y Relative OS [95% CI] | 10-y OS in GP |
|------------------------|-----------|--------------------------|--------------------------|--------------|------------|---------------------------|---------------------------|---------------|
| <b>All TKI Group</b>   |           |                          |                          |              |            |                           |                           |               |
| All N=465              | 312       | 93.5 [91.0-95.9]         | 95.1 [92.6-97.6]         | 98.3         | 127        | 84.2 [79.9-88.6]          | 88.4 [83.9-93.1]          | 95.2          |
| CCyR N=413             | 284       | 95.2 [92.8-97.5]         | 97.0 [94.6-99.4]         | 98.1         | 115        | 87.7 [83.4-92.0]          | 92.3 [87.8-96.8]          | 95.0          |
| MMR N=338              | 234       | 97.3 [95.4-99.3]         | 99.1 [97.1-101.1]        | 98.2         | 91         | 89.9 [85.3-94.4]          | 94.6 [89.8-99.4]          | 95.0          |
| MR4.5 N=159            | 105       | 95.8 [92.1-99.4]         | 97.8 [94.0-101.4]        | 98.0         | 47         | 88.5 [81.9-95.0]          | 93.5 [86.5-100.3]         | 94.7          |
| CMR N=81               | 53        | 98.6 [95.8-100]          | 100.5 [97.7-101.9]       | 98.1         | 21         | 91.7 [82.2-100]           | 96.8 [86.8-105.6]         | 94.7          |
| <b>Imatinib Group</b>  |           |                          |                          |              |            |                           |                           |               |
| All N=266              | 239       | 93.1 [90.0-96.2]         | 94.7 [91.6-97.9]         | 98.3         | 127        | 83.9 [79.2-88.6]          | 88.1 [83.2-93.1]          | 95.2          |
| CCyR N=228             | 212       | 95.1 [92.3-97.9]         | 96.9 [94.1-99.8]         | 98.1         | 115        | 87.8 [83.2-92.3]          | 92.6 [87.8-97.4]          | 94.8          |
| MMR N=183              | 176       | 97.8 [95.7-99.9]         | 99.6 [97.5-101.7]        | 98.2         | 91         | 90.5 [85.8-95.2]          | 95.3 [90.3-100.2]         | 95.0          |
| MR4.5 N=81             | 78        | 97.5 [94.1-100]          | 99.6 [96.1-102.5]        | 97.9         | 47         | 89.7 [82.9-96.5]          | 95.2 [88.0-102.4]         | 94.2          |
| CMR N=34               | 33        | 100                      | 102.0                    | 98.0         | 21         | 93.1 [83.7-100]           | 98.5 [88.6-105.8]         | 94.5          |
| <b>Dasatinib Group</b> |           |                          |                          |              |            |                           |                           |               |
| All N=101              | 40        | 98.5 [95.6-100]          | 100.1 [97.2-101.6]       | 98.4         | 0          | NA                        | NA                        | 95.4          |
| CCyR N=94              | 39        | 98.4 [95.3-100]          | 100.0 [96.8-101.6]       | 98.4         | 0          | NA                        | NA                        | 95.4          |
| MMR N=75               | 30        | 100                      | 101.9                    | 98.1         | 0          | NA                        | NA                        | 94.7          |
| MR4.5 N=37             | 12        | 100                      | 101.8                    | 98.2         | 0          | NA                        | NA                        | 95.1          |
| CMR N= 26              | 9         | 100                      | 101.8                    | 98.2         | 0          | NA                        | NA                        | 94.9          |
| <b>Nilotinib Group</b> |           |                          |                          |              |            |                           |                           |               |
| All N=98               | 33        | 88.5 [79.4-97.5]         | 90.1 [80.9-99.3]         | 98.2         | 0          | NA                        | NA                        | 95.0          |
| CCyR N=91              | 33        | 90.7 [82.0-99.5]         | 92.5 [83.6-101.4]        | 98.1         | 0          | NA                        | NA                        | 94.7          |
| MMR N=80               | 28        | 92.0 [83.3-100]          | 93.7 [84.8-101.8]        | 98.2         | 0          | NA                        | NA                        | 94.8          |
| MR4.5 N=41             | 15        | 85.6 [70.2-100]          | 87.3 [71.6-102.0]        | 98.0         | 0          | NA                        | NA                        | 94.6          |
| CMR N=21               | 11        | 94.1 [82.9-100]          | 95.9 [84.5-101.9]        | 98.1         | 0          | NA                        | NA                        | 94.7          |

Abbreviations: OS, overall survival; GP, general population; CI, confidence interval; CCyR, complete cytogenetic response; MMR, major molecular response; MR4.5, molecular response with 4.5 log reduction by international scale; CMR, complete molecular response; NA, not applicable.

**Figure 2-1. One-year landmark: Relative survival in patients with chronic myeloid leukemia by cumulative response within 1 year**

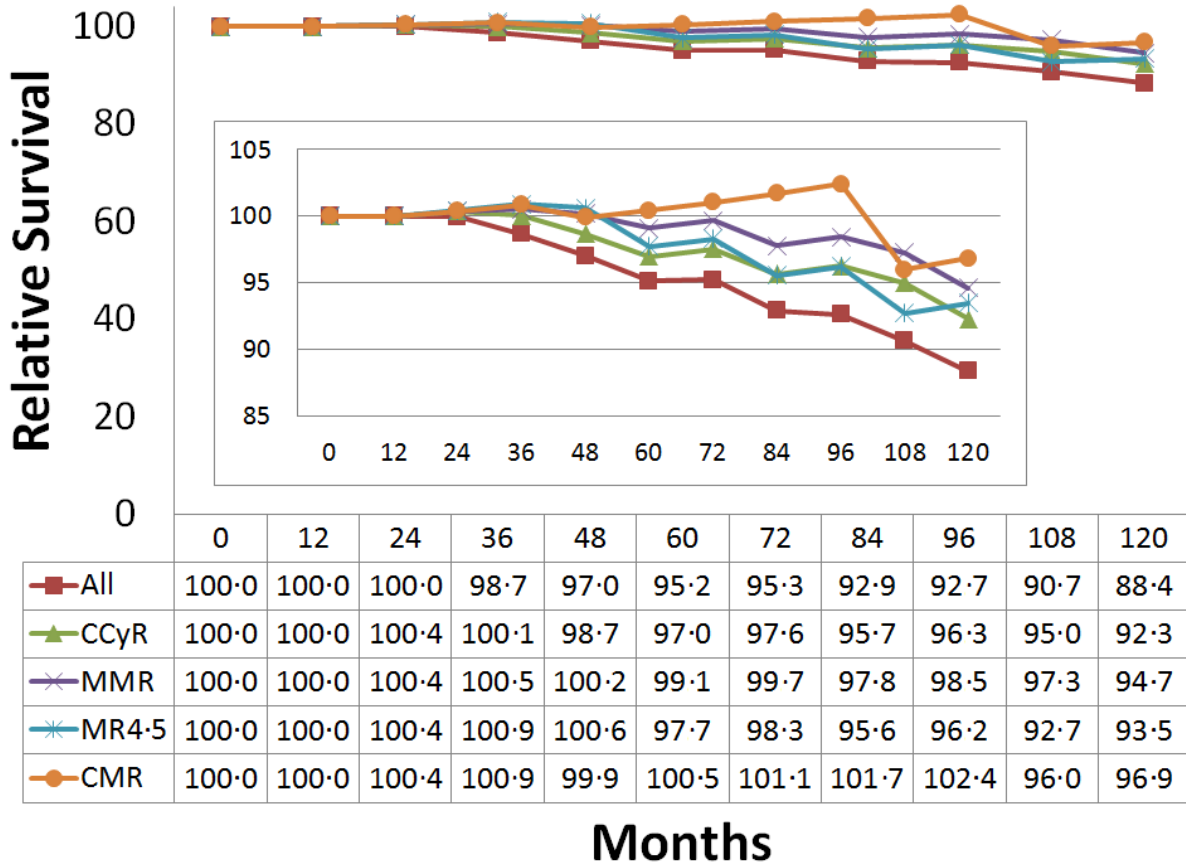

Abbreviations: CCyR, complete cytogenetic response; MMR, major molecular response; MR4·5, molecular response by a 4·5 log reduction on the international scale; CMR, complete molecular response.
